# Supplementary material
Source: publisher site journal article supplement (https://www.spandidos-publications.com/6755/downloadSupplementary)

Figure S1. Proteomic analysis result. (A) 63 proteins were up- and 42 were downregulated in the normoxia group compared with the hypoxia group. (B) The expression of 78 proteins was up-while that of 48 proteins was downregulated in the normoxia group compared with the hypoxia + SAL group. (C) The expression of four proteins was up- and that of 12 was downregulated in the hypoxia group compared with the hypoxia + SAL group.

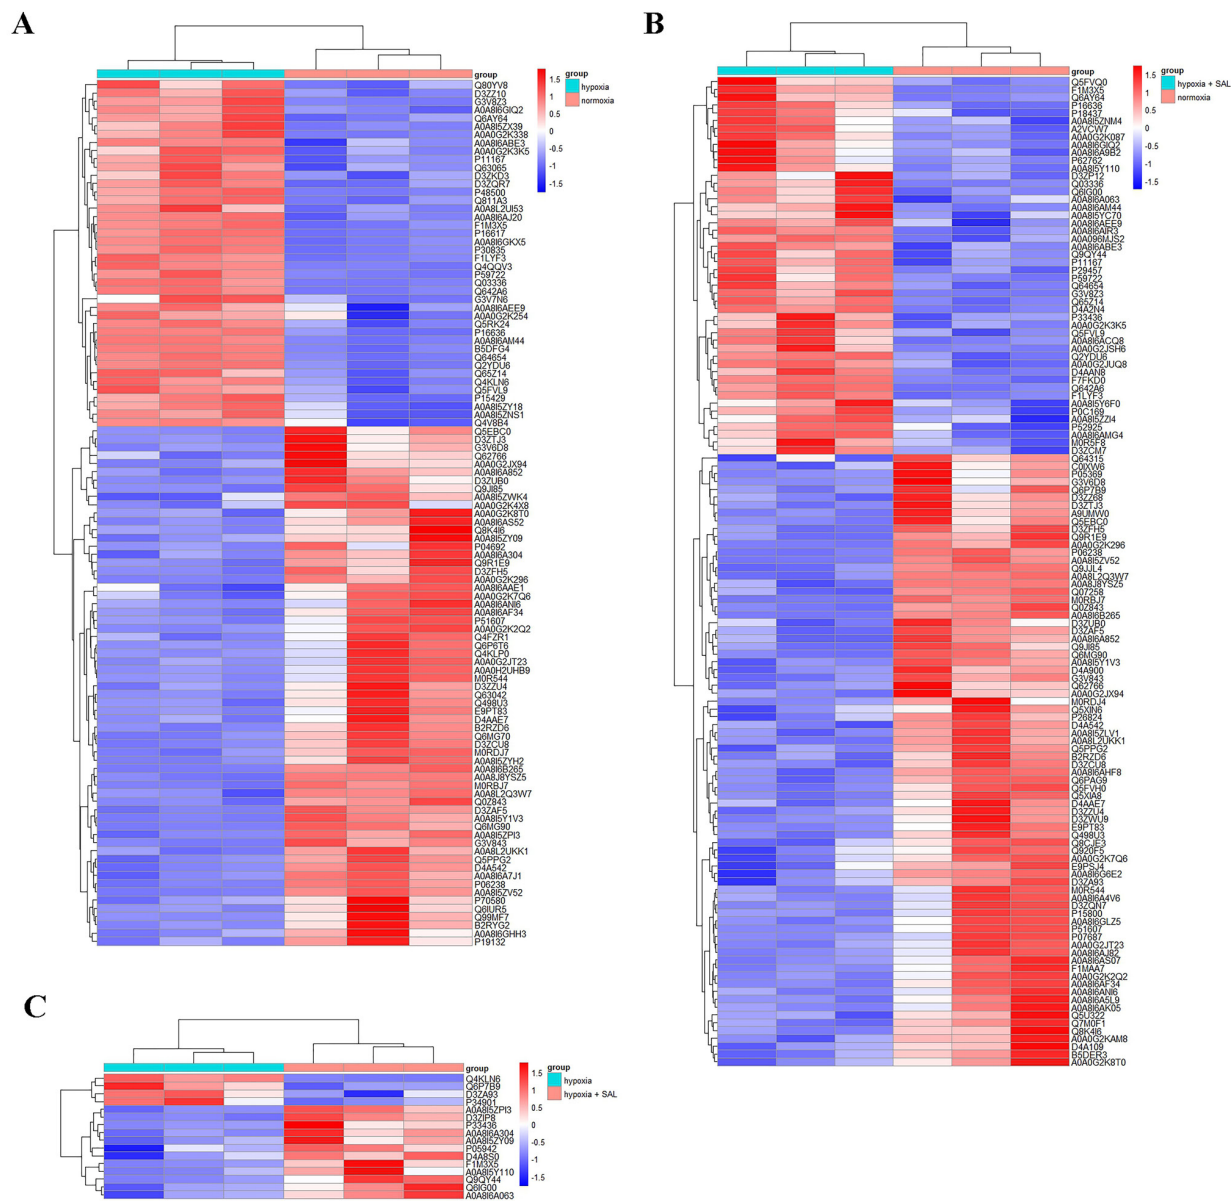

Supplement: Supplementary file 1 [file downloadSupplementary]
